# Supplementary material for: Structural Studies Reveal the Role of Helix 68 in the Elongation Step of Protein Biosynthesis
Source: PubMed Central journal article supplement (PMC9040758; doi:10.1128/mbio.00306-22), 2022-03-29
Supplement: mbio.00306-22-sf001.pdf [file mbio.00306-22-sf001.pdf]

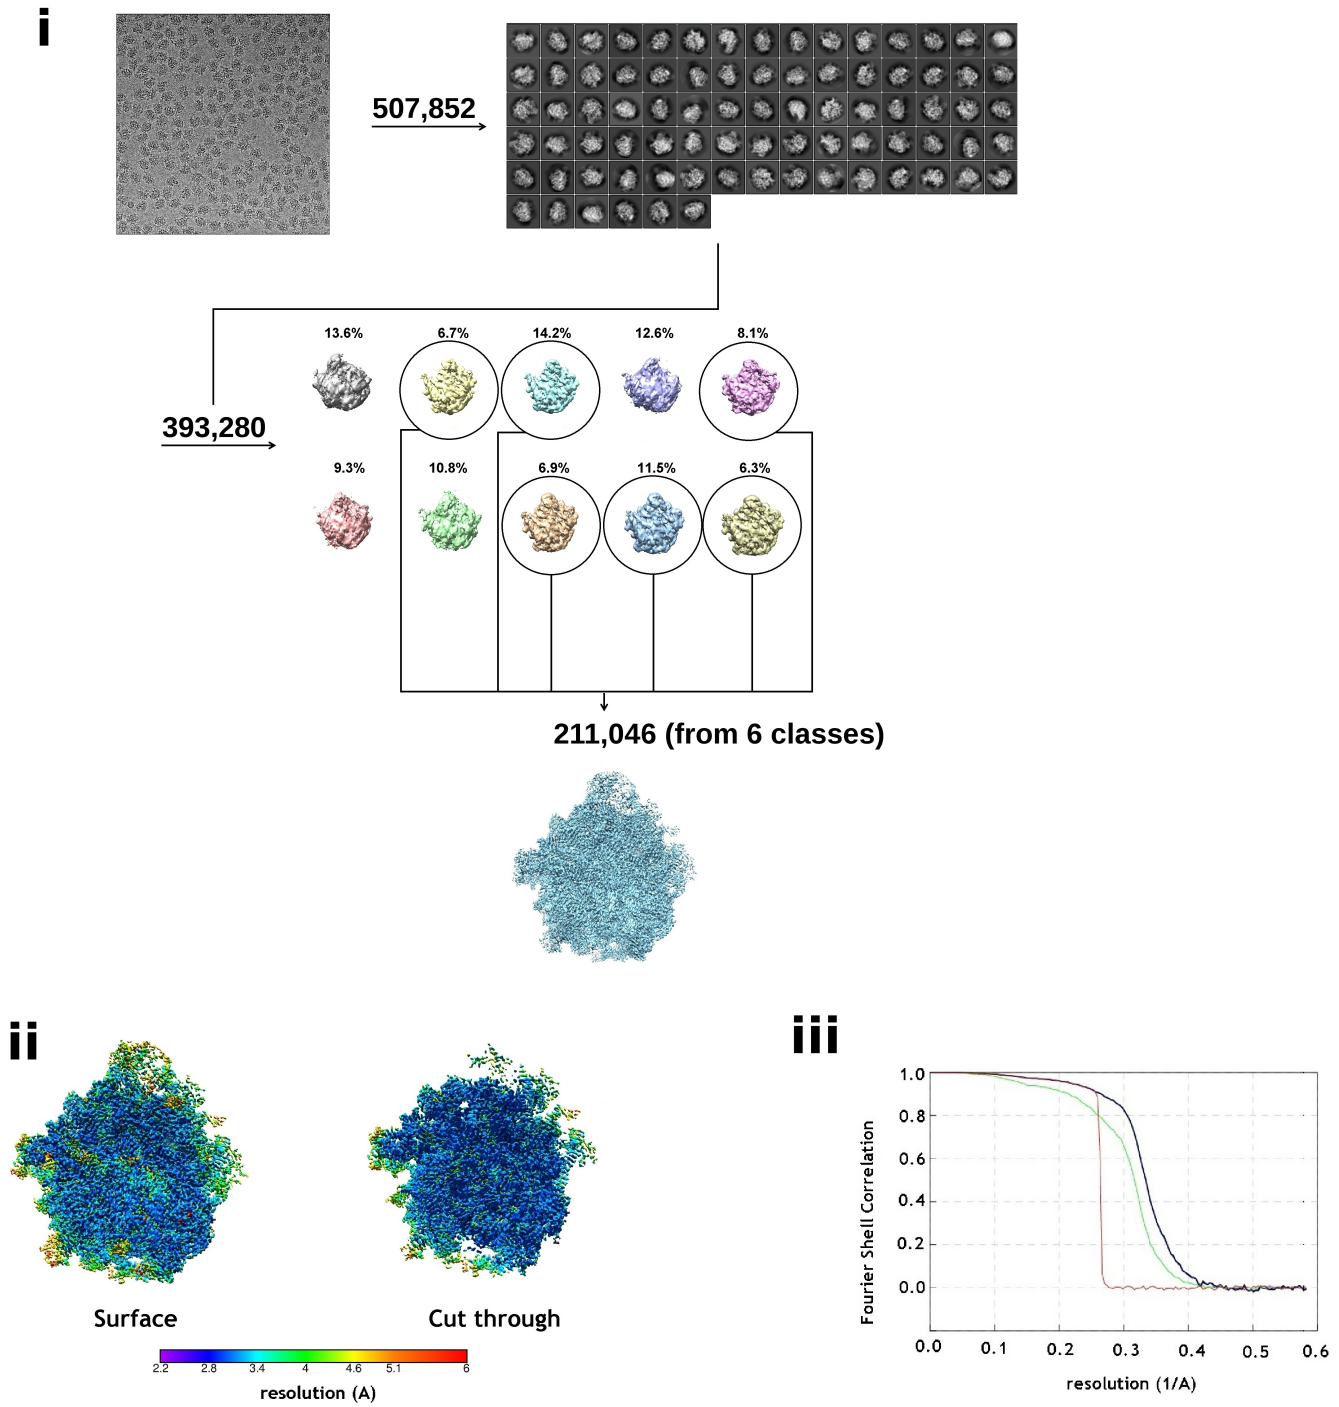

Fig. S1. Panel A

**i**

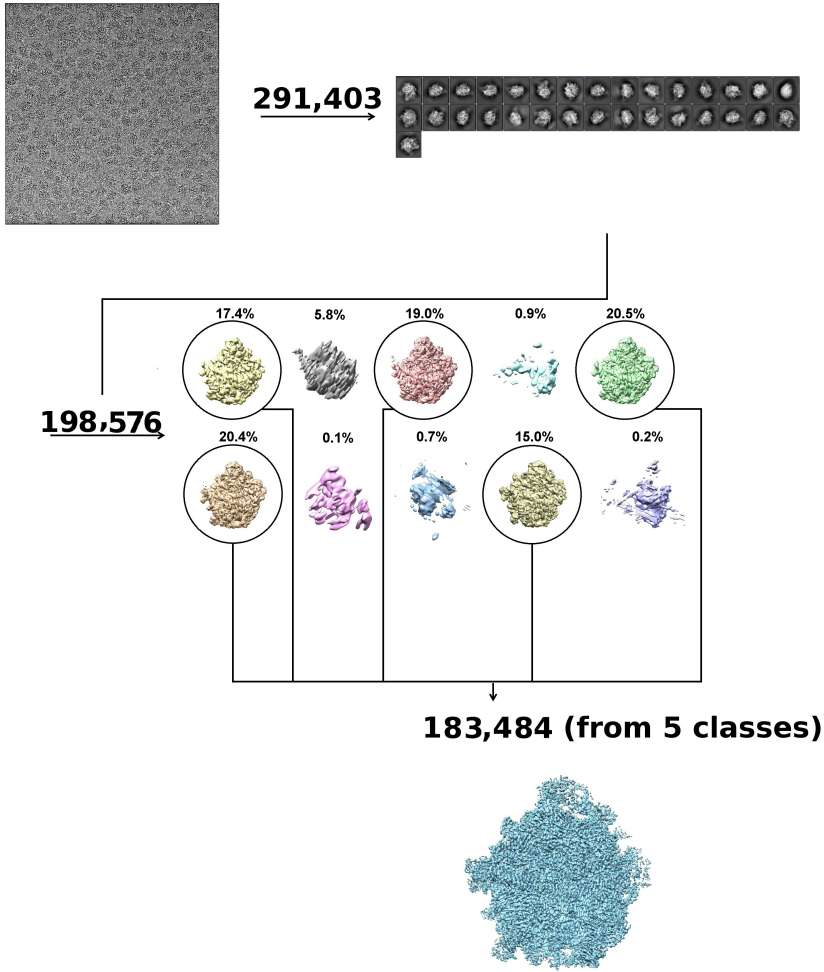

**ii**

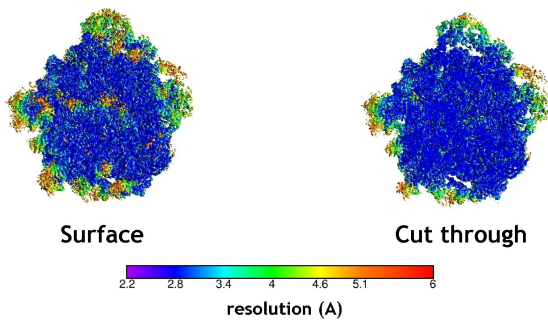

**iii**

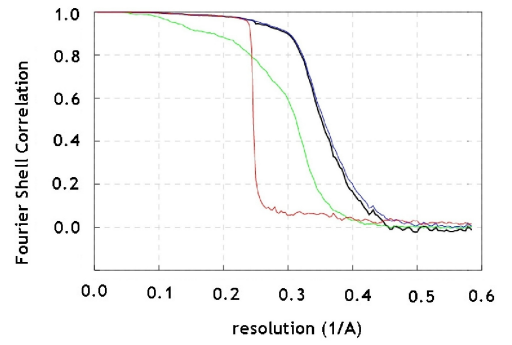

Fig. S1. Panel B

**i**

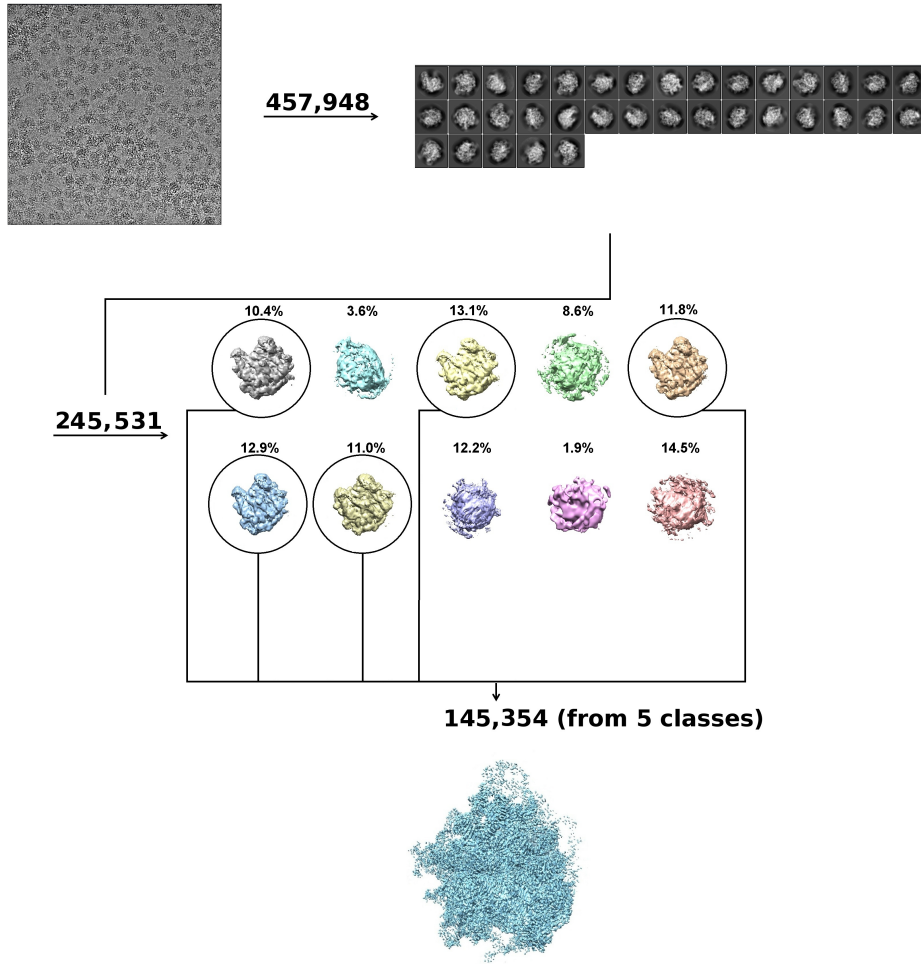

**ii**

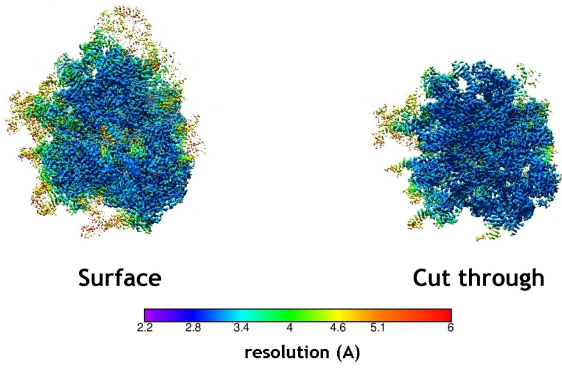

**iii**

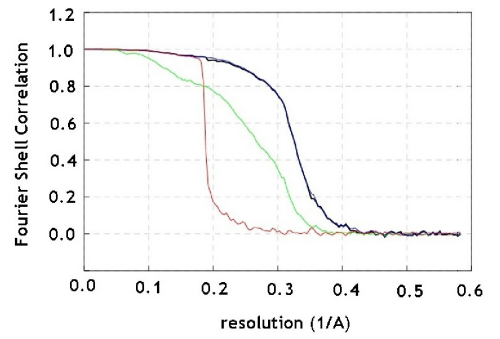

Fig. S1. Panel C

**i**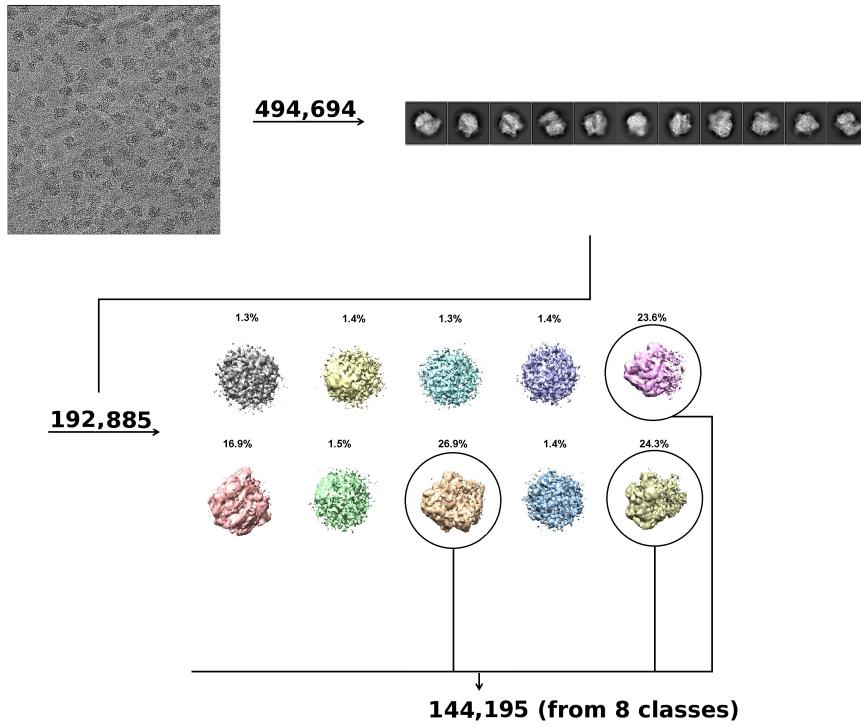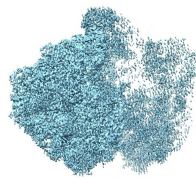**ii**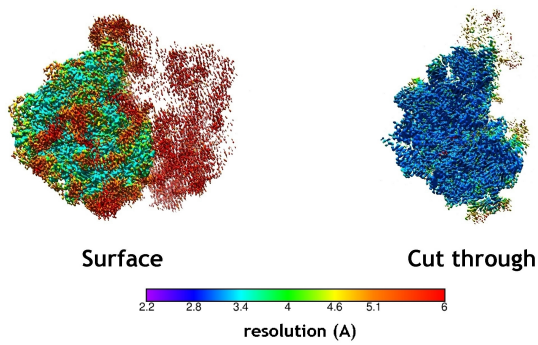**iii**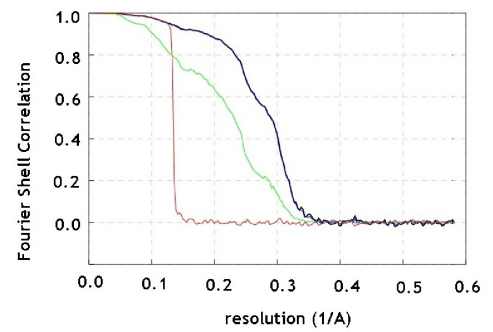

Fig. S1. Panel D

**i**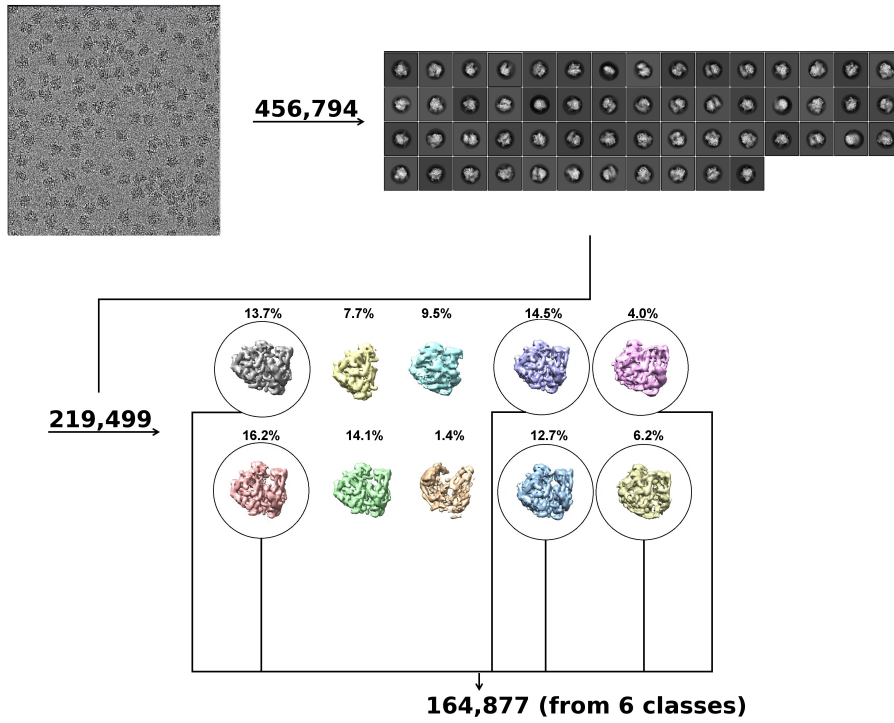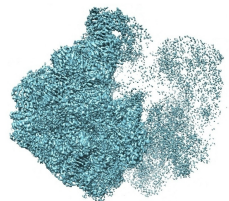**ii**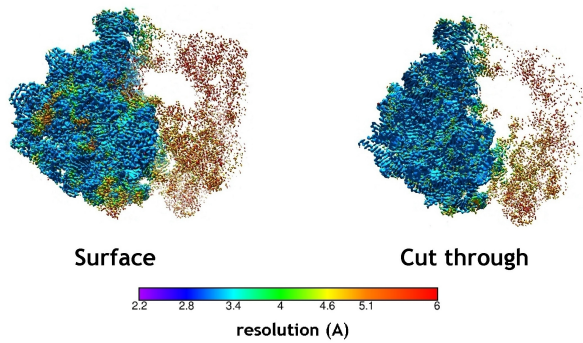**iii**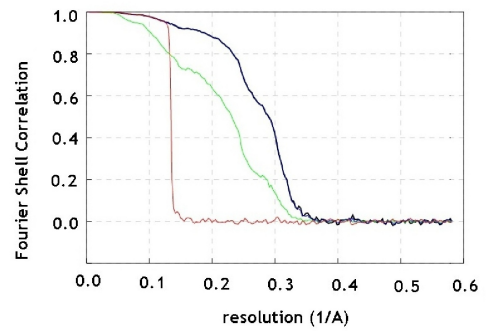

Fig. S1. Panel E
