# Supplementary material for: Structural Studies Reveal the Role of Helix 68 in the Elongation Step of Protein Biosynthesis
Source: PubMed Central journal article supplement (PMC9040758; doi:10.1128/mbio.00306-22), 2022-03-29
Supplement: mbio.00306-22-sf005.pdf [file mbio.00306-22-sf005.pdf]

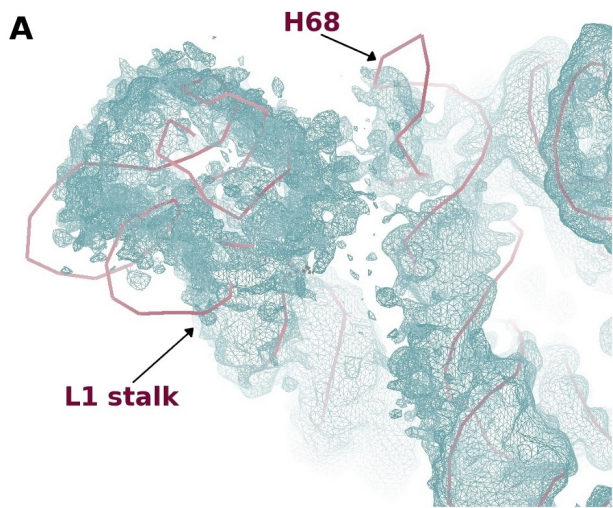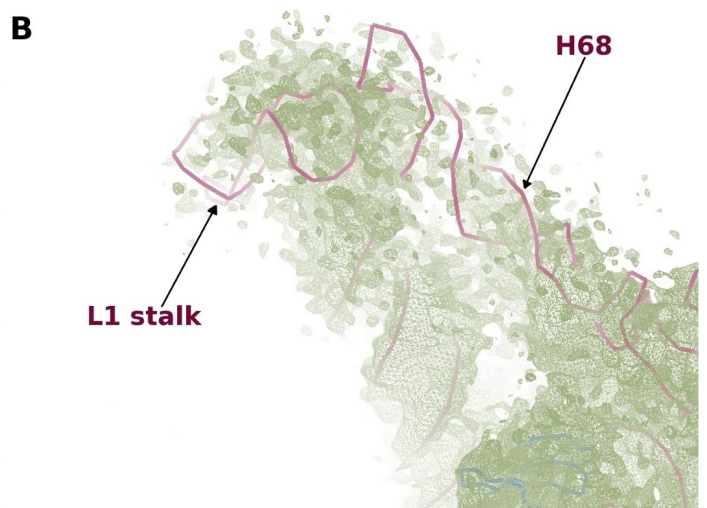

Figure S5
