# Supplementary material for: Structural Studies Reveal the Role of Helix 68 in the Elongation Step of Protein Biosynthesis
Source: PubMed Central journal article supplement (PMC9040758; doi:10.1128/mbio.00306-22), 2022-03-29
Supplement: mbio.00306-22-sf007.pdf [file mbio.00306-22-sf007.pdf]

## IC50 Data

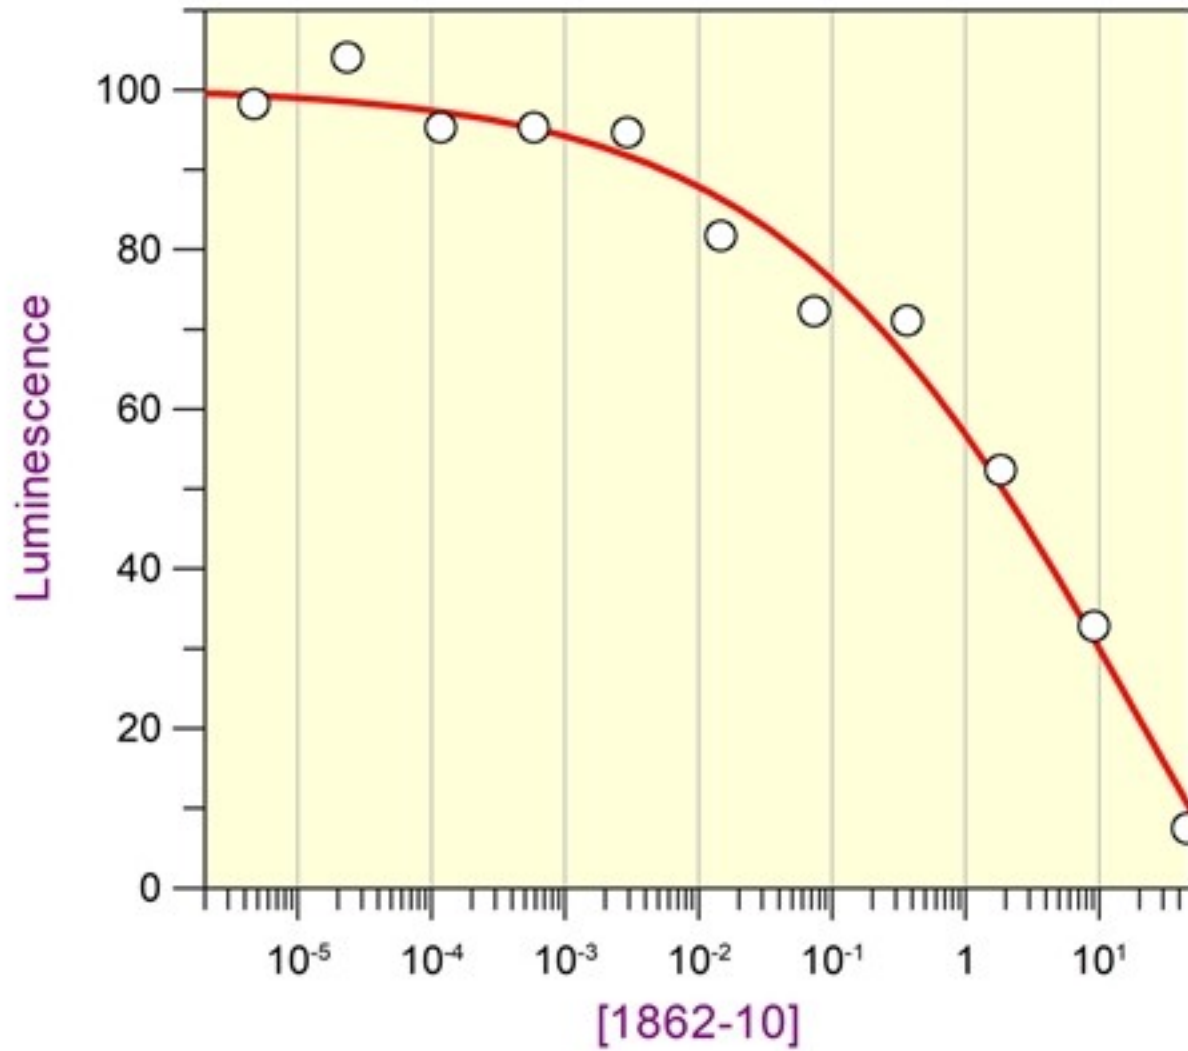

| Parameter    | Value    | Std. Error |
|--------------|----------|------------|
| Y Range      | 159,3372 | 10,3268    |
| IC 50        | 20,6114  | 8,6574     |
| Slope factor | 0,3221   | 0,0359     |

Figure S7A

## IC50 Data

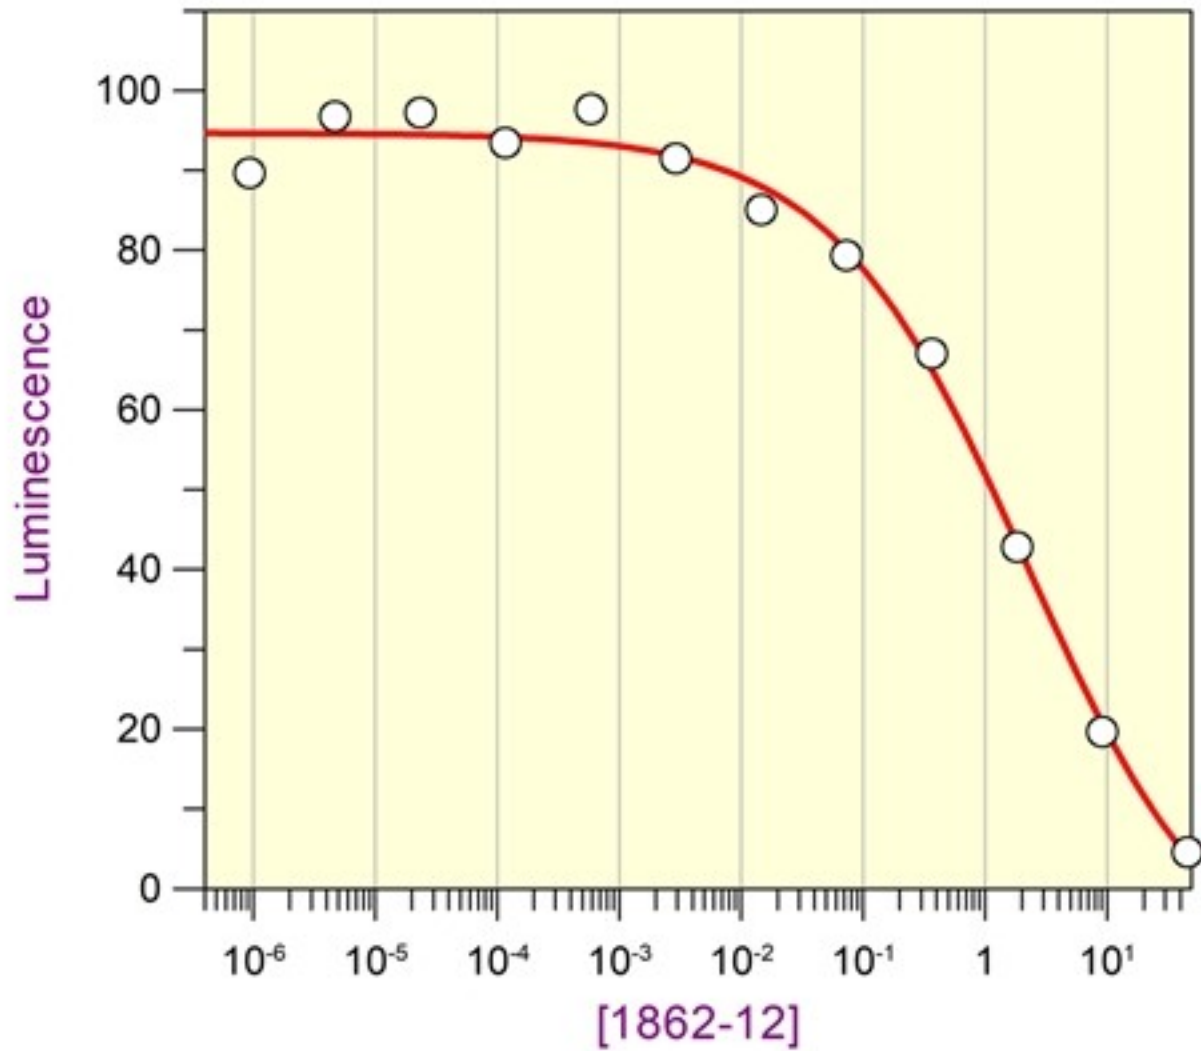

| Parameter    | Value    | Std. Error |
|--------------|----------|------------|
| Y Range      | 108,1077 | 10,5881    |
| IC 50        | 2,1905   | 0,9595     |
| Slope factor | 0,5425   | 0,0755     |

Figure S7B

## IC50 Data

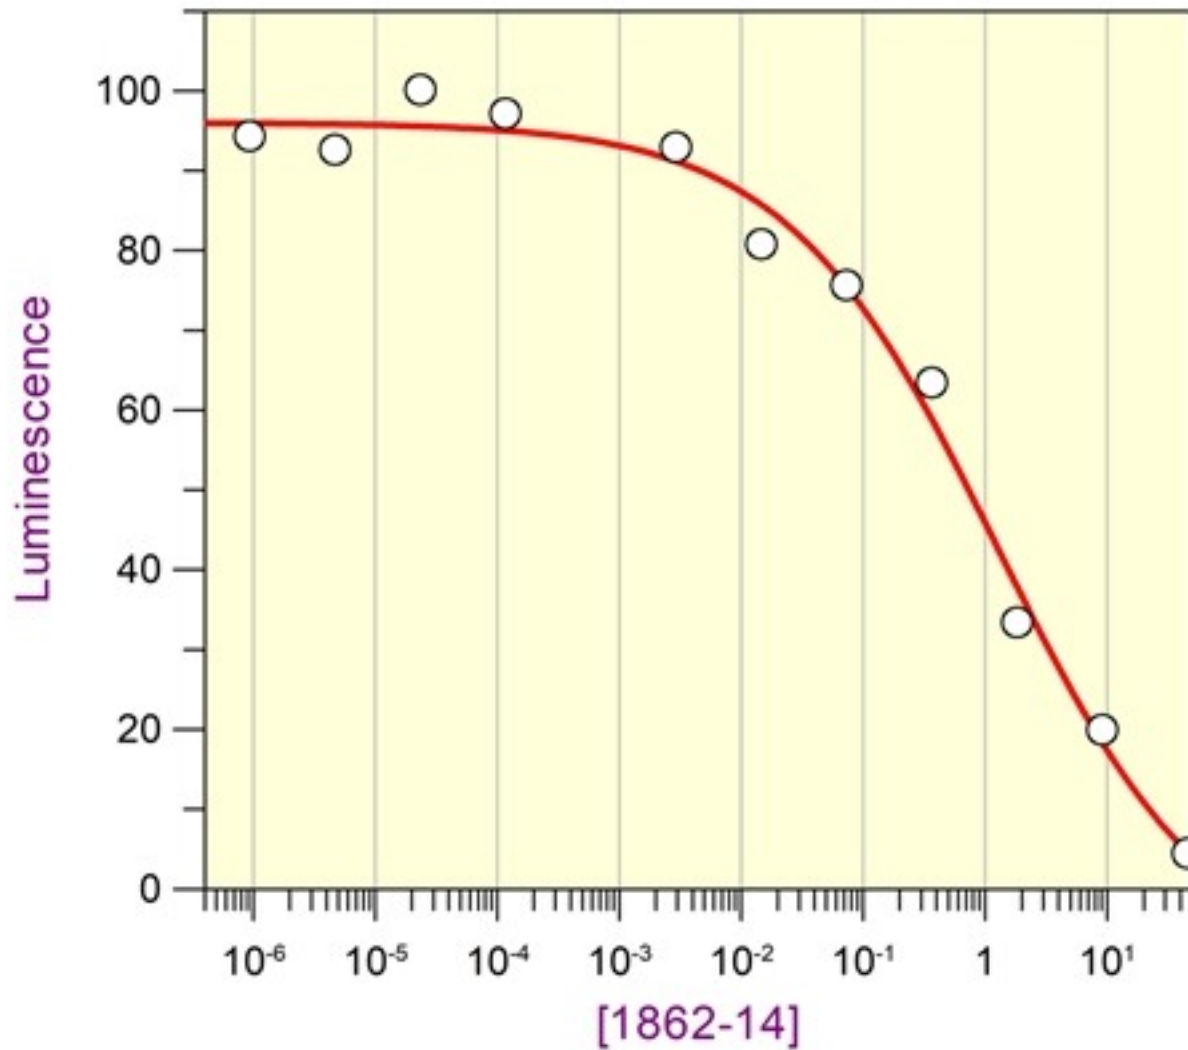

| Parameter    | Value    | Std. Error |
|--------------|----------|------------|
| Y Range      | 106,5107 | 12,5714    |
| IC 50        | 1,2640   | 0,7154     |
| Slope factor | 0,5017   | 0,0902     |

Figure S7C

## IC50 Data

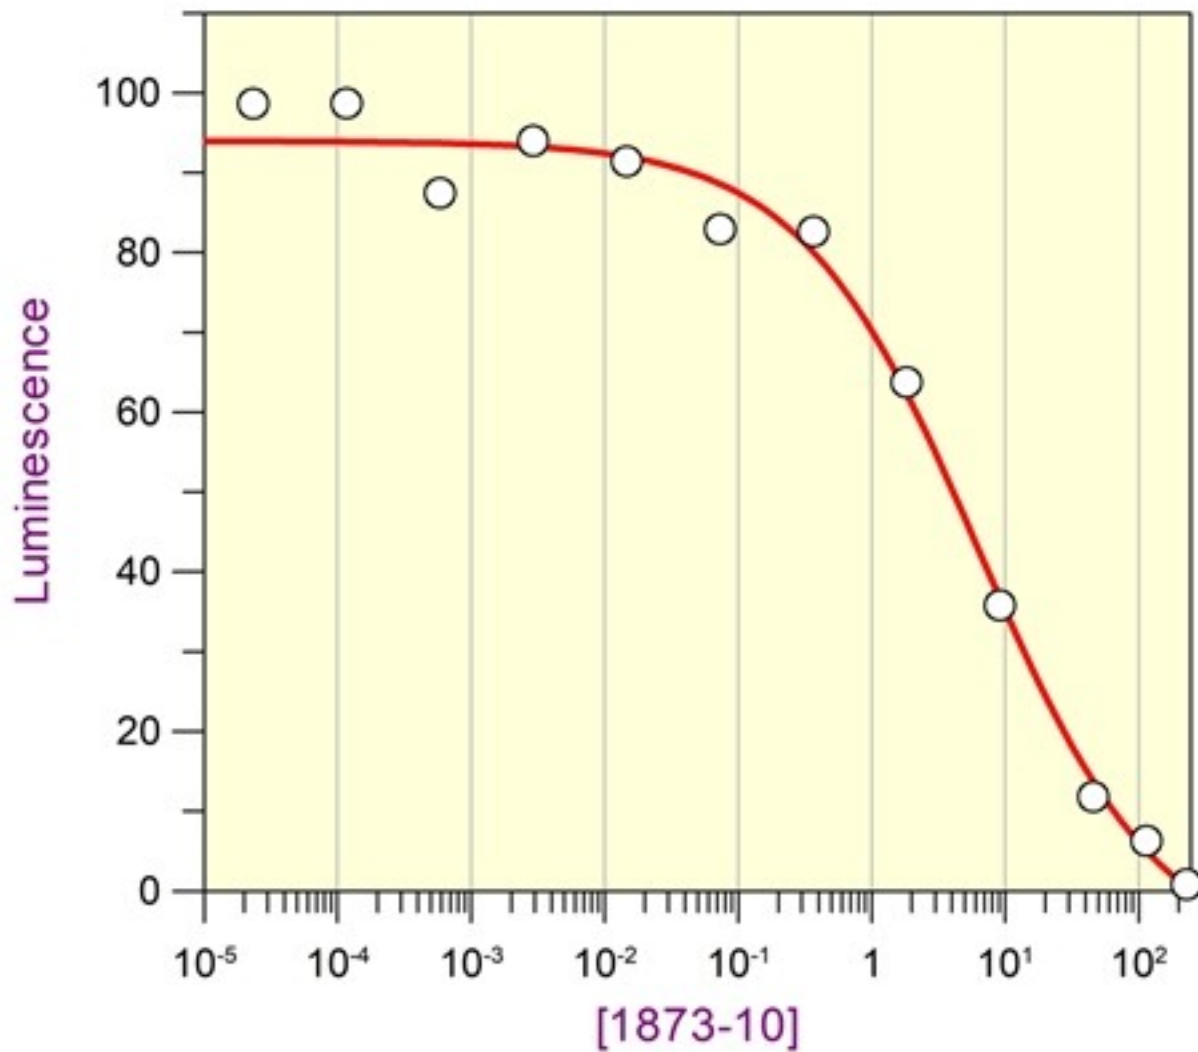

| Parameter    | Value    | Std. Error |
|--------------|----------|------------|
| Y Range      | 102,5131 | 9,0726     |
| IC 50        | 6,3506   | 2,3806     |
| Slope factor | 0,6493   | 0,1119     |

Figure S7D

## IC50 Data

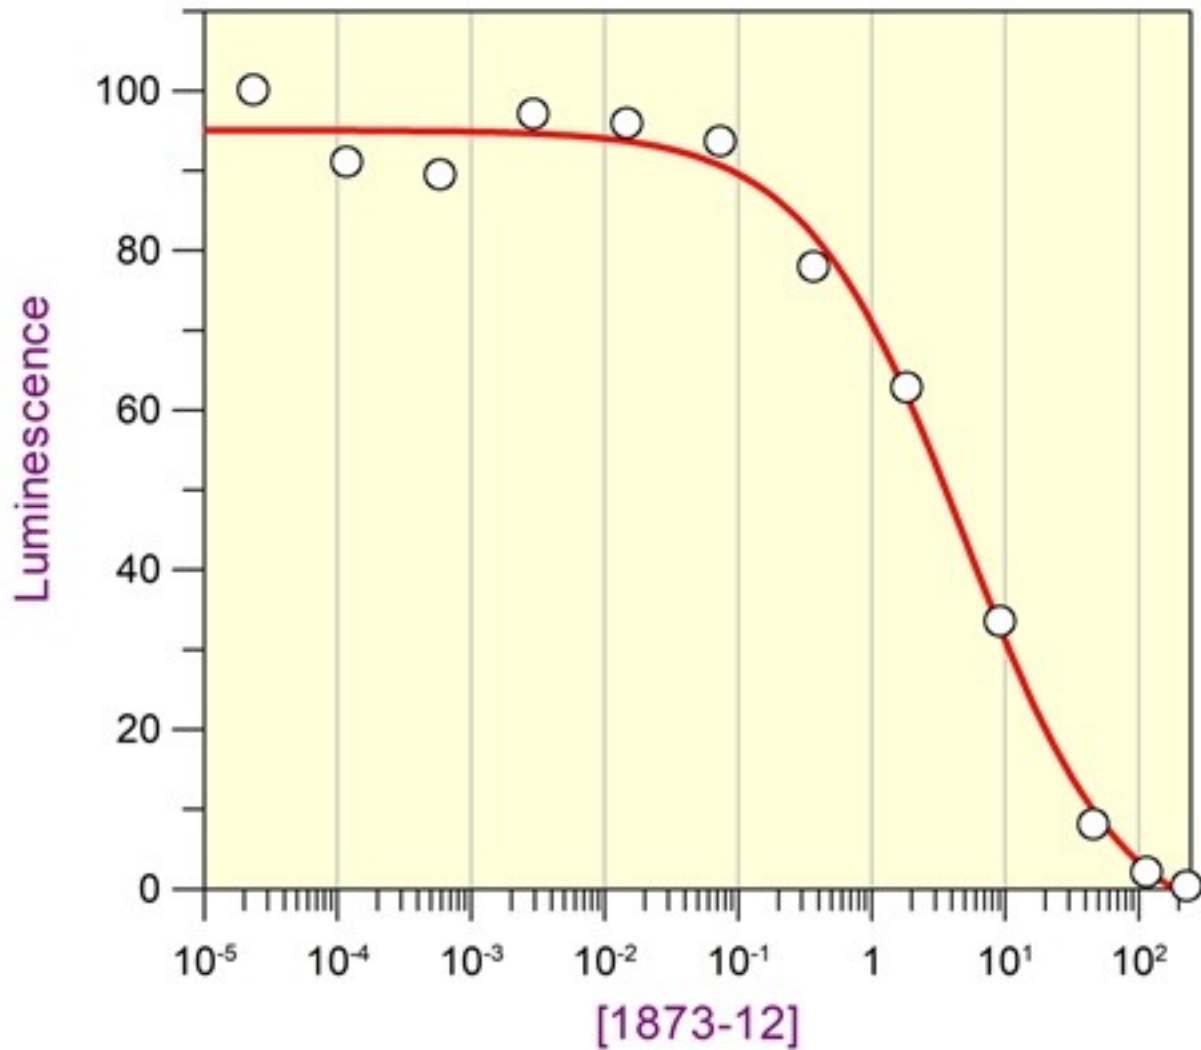

| Parameter    | Value    | Std. Error |
|--------------|----------|------------|
| Y Range      | 101,6656 | 6,2575     |
| IC 50        | 4,8944   | 1,2144     |
| Slope factor | 0,7359   | 0,1086     |

Figure S7E

## IC50 Data

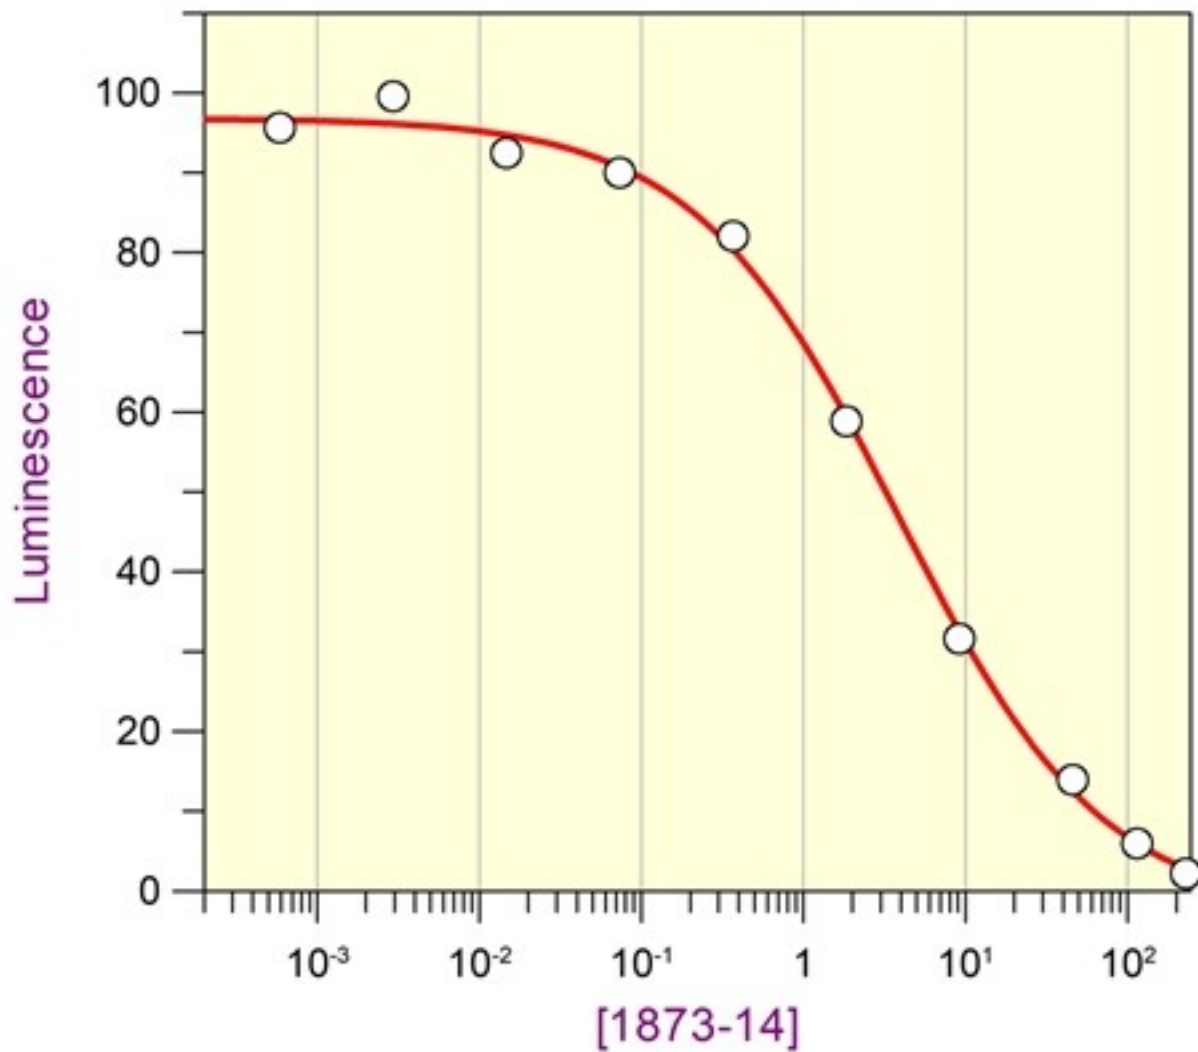

| Parameter    | Value   | Std. Error |
|--------------|---------|------------|
| Y Range      | 99,6637 | 3,7326     |
| IC 50        | 3,8544  | 0,5536     |
| Slope factor | 0,6888  | 0,0610     |

Figure S7F

**i**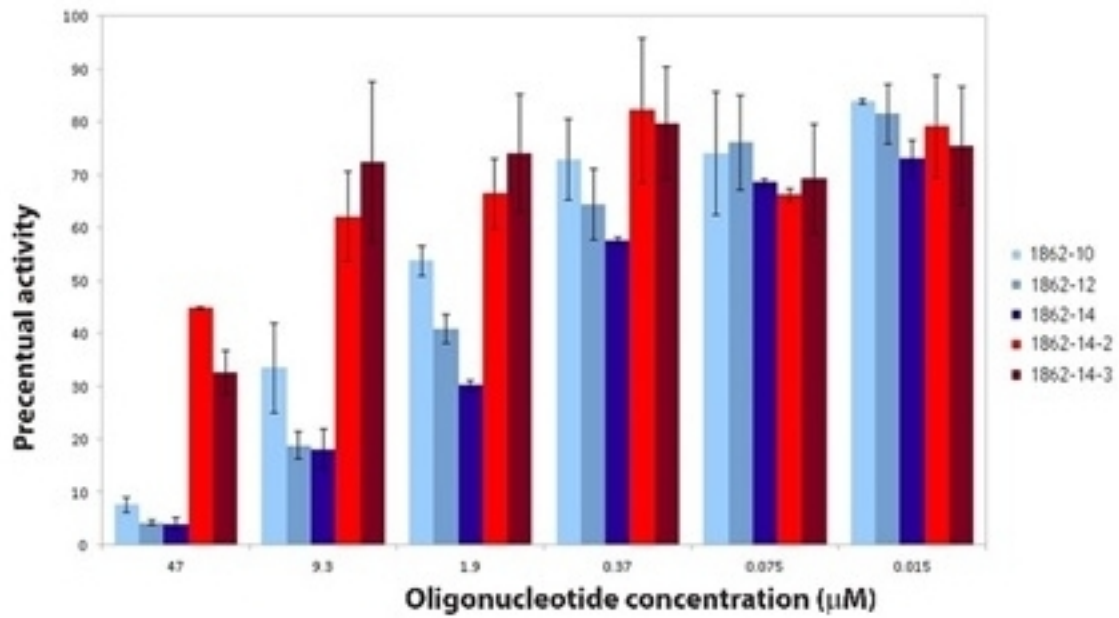**ii**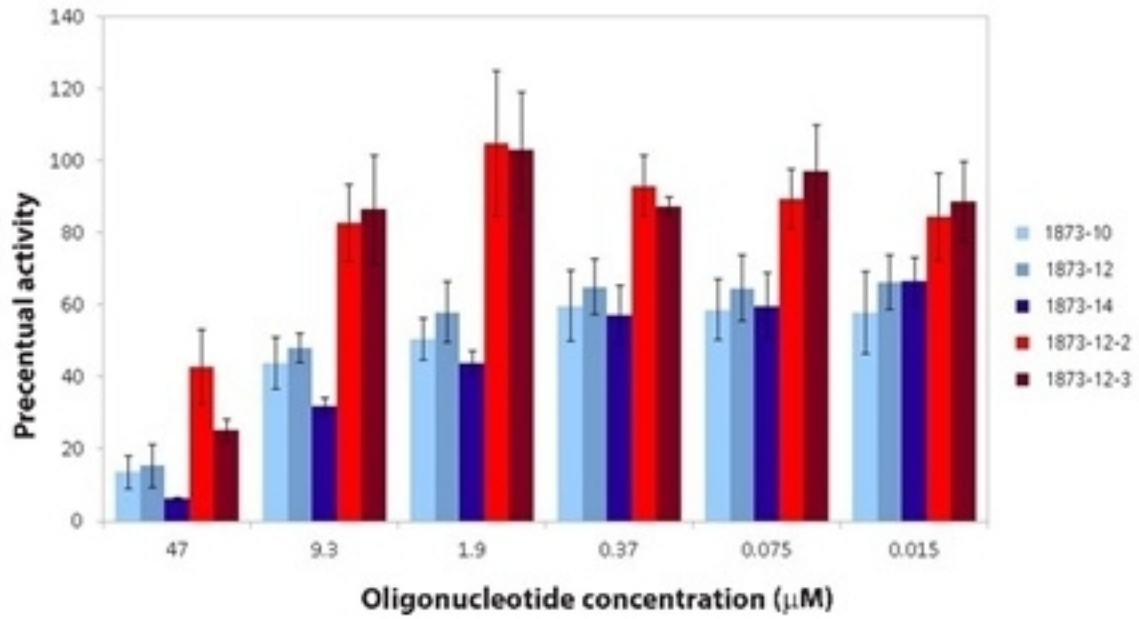

Figure S7. Panel G
