# Supplementary material for: Structural Studies Reveal the Role of Helix 68 in the Elongation Step of Protein Biosynthesis
Source: PubMed Central journal article supplement (PMC9040758; doi:10.1128/mbio.00306-22), 2022-03-29
Supplement: mbio.00306-22-st001.pdf [file mbio.00306-22-st001.pdf]

**Supplementary Table 1: Cryo-EM data collection and model refinement (for all new structures)**

|                                                  |               |               |               |               |               |
|--------------------------------------------------|---------------|---------------|---------------|---------------|---------------|
| Incubation                                       | 0 minutes     | 30 minutes    |               | 50 minutes    |               |
| Subunit                                          | 50S           | 50S           | 70S           | 50S           | 70S           |
| <b>Data Collection</b>                           |               |               |               |               |               |
| Microscope                                       | Titan Krios   |               |               |               |               |
| Camera                                           | Gatan K2      | Falcon III    | Gatan K2      | Falcon III    | Gatan K2      |
| Voltage (kV)                                     | 300           |               |               |               |               |
| Magnification                                    | 29000         | 127000        | 29000         | 127000        | 29000         |
| Pixel size (Å.px <sup>-1</sup> )                 | 0.858         | 1.1           | 0.858         | 1.1           | 0.858         |
| Defocus range (µM)                               | (-0.7)-(-1.3) | -0.5 -(-1.50) | (-0.7)-(-1.3) | -0.5 -(-1.50) | (-0.7)-(-1.3) |
| Total dose (e/Å <sup>2</sup> )                   | 40            |               |               |               |               |
| Micrographs collected                            | 2074          | 1671          | 2532          | 2079          | 3951          |
| <b>Refinement</b>                                |               |               |               |               |               |
| Number of particles (autopicked)                 | 507852        | 291403        | 494694        | 457948        | 456794        |
| Number of particles (used for 3D reconstruction) | 211046        | 183484        | 144195        | 145354        | 164877        |
| Resolution (Å; at FSC <sup>a</sup> = 0.143)      | 2.65          | 2.48          | 3.11          | 2.73          | 2.86          |
| CC (model to map fit)                            | 0.691         | 0.8795        | 0.62          | 0.4175        | 0.84          |
| <b>Model Quality</b>                             |               |               |               |               |               |
| Bonds (°)                                        | 0.01          | 0.01          | 0.007         | 0.007         | 0.008         |

|                               |       |       |       |       |       |
|-------------------------------|-------|-------|-------|-------|-------|
|                               |       |       |       |       |       |
| Angles (°)                    | 1.08  | 0.803 | 0.926 | 1.041 | 1.046 |
| Chirality (°)                 | 0.055 | 0.05  | 0.081 | 0.079 | 0.066 |
| Planarity (°)                 | 0.007 | 0.005 | 0.009 | 0.009 | 0.008 |
| <b>Validation</b>             |       |       |       |       |       |
| Clashscore                    | 4.62  | 5.35  | 26.47 | 13.47 | 26.08 |
| <b>Proteins</b>               |       |       |       |       |       |
| MolProbity score              | 1.55  | 1.80  | 3.55  | 2.22  | 3.66  |
| Rotamer outliers (%)          | 0.64  | 0.20  | 15.47 | 0.39  | 24.26 |
| Ramachandran favored (%)      | 86.15 | 92.11 | 76.08 | 88.7  | 82.33 |
| Ramachandran allowed (%)      | 13.32 | 7.69  | 22.05 | 10.91 | 14.84 |
| Ramachandran outliers (%)     | 0.53  | 0.2   | 1.87  | 0.08  | 2.83  |
| <b>RNA</b>                    |       |       |       |       |       |
| Correct sugar pucker (%)      | 99.8  | 99.66 | 98.54 | 98.31 | 98.83 |
| Correct backbone conformation | 84.35 | 81.95 | 51.97 | 65.23 | 51.38 |
